# Supplementary material for: The novel EpCAM-targeting monoclonal antibody 3–17I linked to saporin is highly cytotoxic after photochemical internalization in breast, pancreas and colon cancer cell lines
Source: PubMed Central journal article supplement — MAbs. 2014 Feb 18;6(4):1038–50. doi: 10.4161/mabs.28207 (PMC4171007; doi:10.4161/mabs.28207), 2014-02-18
Supplement: mabs-6-1038-s01.pdf [file mabs-6-1038-s01.pdf]

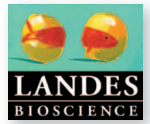

## **Supplemental Material to:**

**Kaja Lund, Monica Bostad, Ellen Skarpen,  
Michael Braunagel, Sergej Kiprijanov, Stefan  
Krauss, Alex Duncan, Anders Høgset, Pål K. Selbo**

**The novel EpCAM-targeting monoclonal antibody 3–17I  
linked to saporin is highly cytotoxic after photochemical  
internalization in breast, pancreas and colon cancer cell  
lines**

**2014; mAbs 6(3)**

**<http://dx.doi.org/10.4161/mabs.28207>**

**<https://www.landesbioscience.com/journals/mabs/article/28207/>**

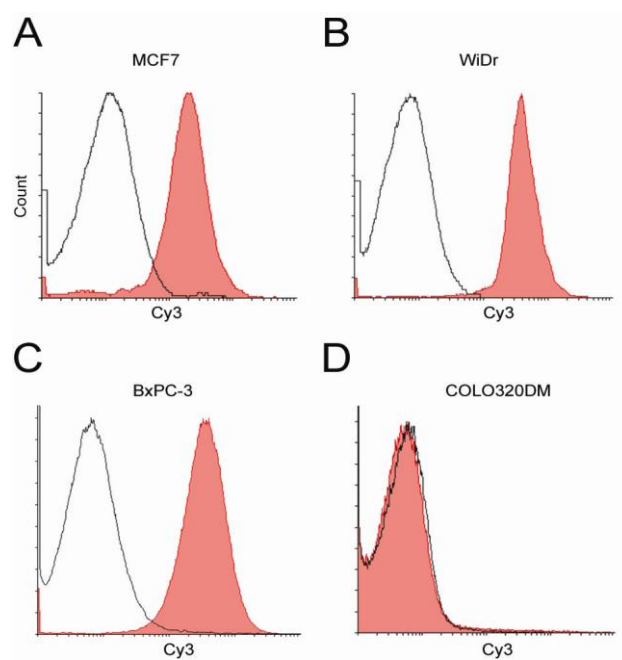

**Supplementary Figure 1. Flow cytometric analysis confirms binding of biotinylated 3-17I to EpCAM-positive cell lines. The cancer cells (A) MCF7; (B) WiDr; (C) BxPC-3 and (D) COLO320DM were stained with 3-17I-CY-3 (orange), as described in *Materials and Methods*. Unstained cells (black) and the 3-17I negative cell line COLO320DM were used as a negative control.**

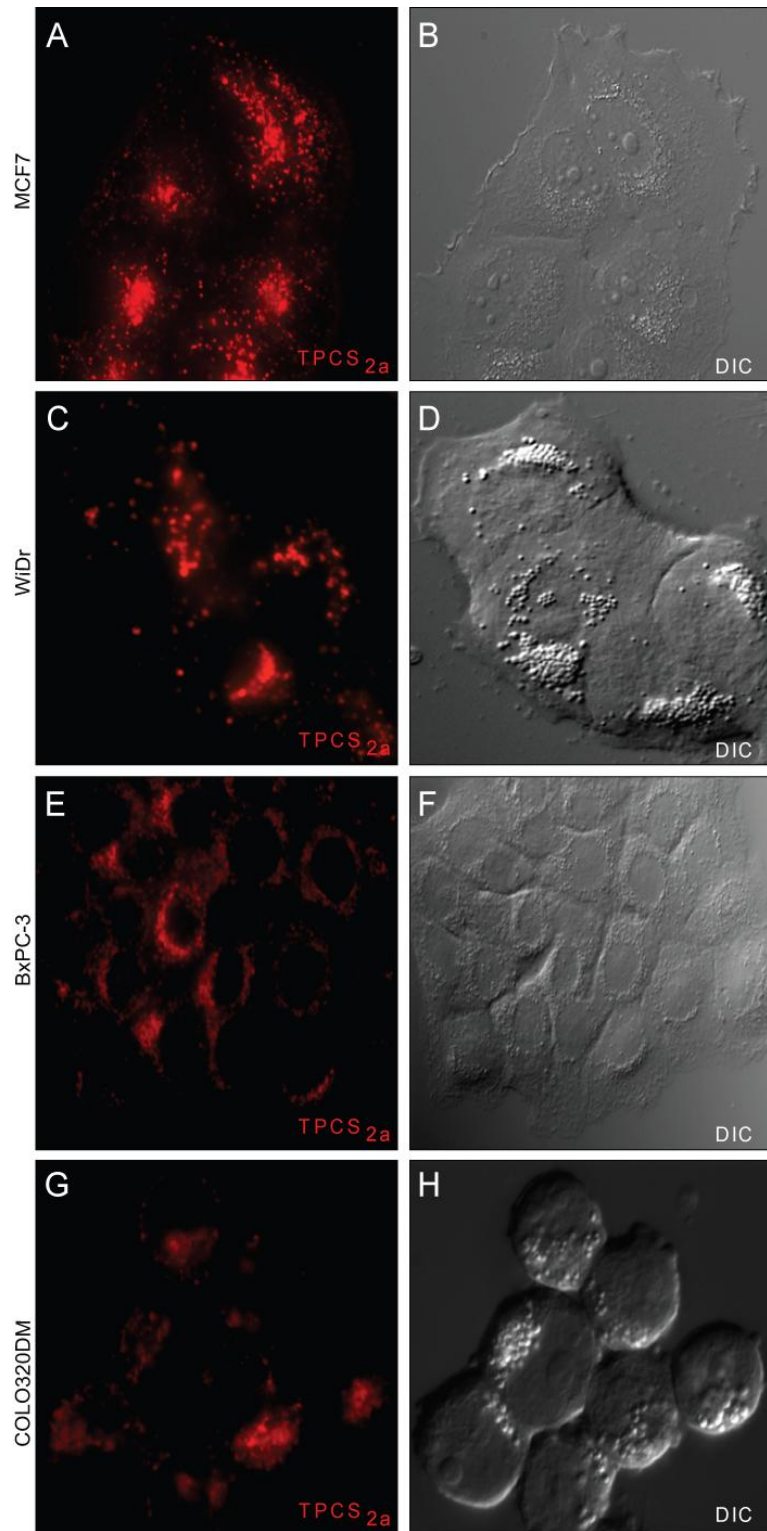

**Supplementary Figure 2. Intracellular localization of the photosensitizer (TPCS<sub>2a</sub>/Amphinex) in carcinoma cell lines.** TPCS<sub>2a</sub> was incubated for 18 h and chased in drug free medium for 4 h prior to epi-fluorescence microscopy, following the PCI protocol, in MCF7 (A-B); WiDr (C-D); BxPC-3 (E-F); and COLO320DM (G-H) cells.

**Supplementary Table 1A.** Immunohistochemistry studies of normal tissue reactivity (n = 90) of 3-17I, MT201, and MOC31 (all IgG2A), and IgG2A isotype control. Triplicate samples from 30 different tissues are included in the study. Staining intensity was judged as; negative (0), weak reaction (1+), moderate reaction (2+), or strong reaction (3+).

| <b>Tissue</b>              | <b>MOC31B</b>            | <b>MT201</b>        | <b>3-17I</b>             | <b>Isotype, IgG2A</b> |
|----------------------------|--------------------------|---------------------|--------------------------|-----------------------|
| <b>Adrenal 1</b>           | 1+, diffuse              | Neg.                | Neg.                     | Neg.                  |
| <b>Adrenal 2</b>           | 1+, diffuse              | Neg.                | Neg.                     | Neg.                  |
| <b>Adrenal 3</b>           | Neg.                     | Neg.                | Neg.                     | Neg.                  |
| <b>Brain, cerebellum 1</b> | Neg.                     | Neg.                | Neg.                     | Neg.                  |
| <b>Brain, cerebellum 2</b> | Neg.                     | Neg.                | Neg.                     | Neg.                  |
| <b>Brain, cerebellum 3</b> | Neg.                     | Neg.                | Neg.                     | Neg.                  |
| <b>Brain, cerebrum 1</b>   | Neg.                     | Neg.                | Neg.                     | Neg.                  |
| <b>Brain, cerebrum 2</b>   | Neg.                     | Neg.                | Neg.                     | Neg.                  |
| <b>Brain, cerebrum 3</b>   | Neg.                     | Neg.                | Neg.                     | Neg.                  |
| <b>Brain, pituitary, 1</b> | 3+, local                | Neg.                | 3+, local                | Neg.                  |
| <b>Brain, pituitary, 2</b> | 3+, in epithelial cells  | Neg.                | 3+, in epithelial cells  | Neg.                  |
| <b>Brain, pituitary, 3</b> | 3+, in epithelial cells  | Neg.                | 3+, in epithelial cells  | Neg.                  |
| <b>Breast 1</b>            | 3+, in epithelial cells  | Neg.                | 3+, in epithelial cells  | Neg.                  |
| <b>Breast 2</b>            | 3+, in epithelial cells  | Neg.                | 3+, in epithelial cells  | Neg.                  |
| <b>Breast 3</b>            | 3+, in epithelial cells  | unspecific in mucin | 3+, in epithelial cells  | unspecific in mucin   |
| <b>Colon 1</b>             | 3+, in epithelial cells  | unspecific in mucin | 3+, in epithelial cells  | unspecific in mucin   |
| <b>Colon 2</b>             | 3+, in epithelial cells  | unspecific in mucin | 3+, in epithelial cells  | unspecific in mucin   |
| <b>Colon 3</b>             | 3+, in epithelial cells  | unspecific in mucin | 3+, in epithelial cells  | unspecific in mucin   |
| <b>Esophagus 1</b>         | 2+, in epithelial cells  | Neg.                | 3+, in sloughed cells    | Neg.                  |
| <b>Esophagus 2</b>         | 2+, in epithelial cells  | Neg.                | Neg.                     | Neg.                  |
| <b>Esophagus 3</b>         | Neg (no epithelium)      | Neg.                | Neg.                     | Neg.                  |
| <b>Heart 1</b>             | Neg.                     | Neg.                | Neg.                     | Neg.                  |
| <b>Heart 2</b>             | Neg.                     | Neg.                | Neg.                     | Neg.                  |
| <b>Heart 3</b>             | Neg.                     | Neg.                | Neg.                     | Neg.                  |
| <b>Kidney 1</b>            | 3+ in tubular epithelium | Neg.                | 3+ in tubular epithelium | Neg.                  |
| <b>Kidney 2</b>            | 3+ in tubular epithelium | Neg.                | 3+ in tubular epithelium | Neg.                  |
| <b>Kidney 3</b>            | 3+ in tubular epithelium | Neg.                | 3+ in tubular epithelium | Neg.                  |

|                          |                           |                                                |                      |                         |
|--------------------------|---------------------------|------------------------------------------------|----------------------|-------------------------|
| <b>Liver 1</b>           | 3+, local                 | 1+ diffuse unspecific reaction                 | 3+, local            | Neg.                    |
| <b>Liver 2</b>           | 3+, local                 | 1+ diffuse unspecific reaction                 | 3+, local            | Neg.                    |
| <b>Liver 3</b>           | 3+, local                 | 1+ diffuse unspecific reaction                 | 3+, local            | Neg.                    |
| <b>Lung 1</b>            | 2+                        | Neg.                                           | 1+                   | Neg.                    |
| <b>Lung 2</b>            | 2+                        | Neg.                                           | 1+                   | Neg.                    |
| <b>Lung 3</b>            | 3+                        | Neg.                                           | 2+                   | Neg.                    |
| <b>Skeletal muscle 1</b> | Neg.                      | Neg.                                           | Neg.                 | Neg.                    |
| <b>Skeletal muscle 2</b> | Neg.                      | Neg.                                           | Neg.                 | Neg.                    |
| <b>Skeletal muscle 3</b> | Neg.                      | Neg.                                           | Neg.                 | Neg.                    |
| <b>Mesothelial 1</b>     | Neg.                      | Neg.                                           | Neg.                 | Neg.                    |
| <b>Mesothelial 2</b>     | Neg.                      | Neg.                                           | Neg.                 | Neg.                    |
| <b>Mesothelial 3</b>     | Neg.                      | Neg.                                           | Neg.                 | Neg.                    |
| <b>Nerve 1</b>           | Neg.                      | Neg.                                           | Neg.                 | Neg.                    |
| <b>Nerve 2</b>           | Neg.                      | Neg.                                           | Neg.                 | Neg.                    |
| <b>Nerve 3</b>           | Neg.                      | Neg.                                           | Neg.                 | Neg.                    |
| <b>Ovary 1</b>           | Neg.                      | Neg.                                           | Neg.                 | Neg.                    |
| <b>Ovary 2</b>           | Neg.                      | Neg.                                           | Neg.                 | Neg.                    |
| <b>Ovary 3</b>           | Neg.                      | Neg.                                           | Neg.                 | Neg.                    |
| <b>Pancreas 1</b>        | 3+, epithelial cells      | 1+ diffuse unspecific reaction                 | 3+, epithelial cells | Neg.                    |
| <b>Pancreas 2</b>        | 3+, epithelial cells      | 2+, unspecific reaction                        | 3+, epithelial cells | 2+, unspecific reaction |
| <b>Pancreas 3</b>        | 3+, epithelial cells      | 2+, unspecific reaction                        | 3+, epithelial cells | 2+, unspecific reaction |
| <b>Placenta 1</b>        | Neg.                      | Neg.                                           | Neg.                 | Neg.                    |
| <b>Placenta 2</b>        | Neg.                      | Neg.                                           | Neg.                 | Neg.                    |
| <b>Placenta 3</b>        | Neg.                      | Neg.                                           | Neg.                 | Neg.                    |
| <b>Prostate 1</b>        | 3+, epithelial cells      | Neg.                                           | 3+, epithelial cells | Neg.                    |
| <b>Prostate 2</b>        | Neg.(no epithelial cells) | Neg.                                           | Neg.                 | Neg.                    |
| <b>Prostate 3</b>        | 3+, epithelial cells      | Neg.                                           | 3+, epithelial cells | Neg.                    |
| <b>Salivary gland 1</b>  | 3+, epithelial cells      | Neg.                                           | 3+, epithelial cells | Neg.                    |
| <b>Salivary gland 2</b>  | 3+, epithelial cells      | Local unsp. reaction due to folding of section | 3+, epithelial cells | Neg.                    |
| <b>Salivary gland 3</b>  | 3+, epithelial cells      | Neg.                                           | 3+, epithelial cells | Neg.                    |
| <b>Skin 1</b>            | 2+, in epidermis          | Neg.                                           | 1+, in epidermis     | Neg.                    |
| <b>Skin 2</b>            | 2+, in epidermis          | Neg.                                           | 1+, in epidermis     | Neg.                    |
| <b>Skin 3</b>            | 1+, in epidermis          | Neg.                                           | 1+, in epidermis     | Neg.                    |
| <b>Small intestine 1</b> | 3+, epithelial cells      | unspecific in mucin                            | 3+, epithelial cells | unspecific in mucin     |

|                          |                                                           |                                 |                                                           |                     |
|--------------------------|-----------------------------------------------------------|---------------------------------|-----------------------------------------------------------|---------------------|
| <b>Small intestine 2</b> | 3+, epithelial cells                                      | unspecific in mucin             | 3+, epithelial cells                                      | unspecific in mucin |
| <b>Small intestine 3</b> | 3+, epithelial cells                                      | unspecific in mucin             | 3+, epithelial cells                                      | unspecific in mucin |
| <b>Spleen 1</b>          | Neg.                                                      | Neg.                            | Neg.                                                      | Neg.                |
| <b>Spleen 2</b>          | Neg.                                                      | Neg.                            | Neg.                                                      | Neg.                |
| <b>Spleen 3</b>          | Neg.                                                      | Neg.                            | Neg.                                                      | Neg.                |
| <b>Stomach 1</b>         | Neg. (no epithelium)                                      | Neg.                            | 3+, epithelial cells                                      | Neg.                |
| <b>Stomach 2</b>         | 3+, epithelial cells                                      | Neg.                            | 3+, epithelial cells                                      | Neg.                |
| <b>Stomach 3</b>         | 3+, epithelial cells                                      | Neg.                            | 3+, epithelial cells                                      | Neg.                |
| <b>Testis 1</b>          | 3+, cells in seminiferous tubules, probably Sertoli cells | Neg.                            | 3+, cells in seminiferous tubules, probably Sertoli cells | Neg.                |
| <b>Testis 2</b>          | 3+, cells in seminiferous tubules, probably Sertoli cells | Neg.                            | 3+, cells in seminiferous tubules, probably Sertoli cells | Neg.                |
| <b>Testis 3</b>          | 3+, cells in seminiferous tubules, probably Sertoli cells | Neg.                            | 3+, cells in seminiferous tubules, probably Sertoli cells | Neg.                |
| <b>Thymus 1</b>          | 3+, probably in epithelial cells of medulla               | 1+, diffuse reaction in medulla | 3+, probably in epithelial cells of medulla               | Neg.                |
| <b>Thymus 2</b>          | 3+, probably in epithelial cells of medulla               | 1+, diffuse reaction in medulla | 3+, probably in epithelial cells of medulla               | Neg.                |
| <b>Thymus 3</b>          | 3+, probably in epithelial cells of medulla               | 1+, diffuse reaction in medulla | 3+, probably in epithelial cells of medulla               | Neg.                |
| <b>Thyroid 1</b>         | 3+, epithelial cells                                      | Neg.                            | 3+, epithelial cells                                      | Neg.                |
| <b>Thyroid 2</b>         | 3+, epithelial cells                                      | Neg.                            | 3+, epithelial cells                                      | Neg.                |
| <b>Thyroid 3</b>         | 3+, epithelial cells                                      | Neg.                            | 3+, epithelial cells                                      | Neg.                |
| <b>Tonsil 1</b>          | Neg.                                                      | Neg.                            | Neg.                                                      | Neg.                |
| <b>Tonsil 2</b>          | 2+, in surrounding squamous epithelial cells              | Neg.                            | Neg.                                                      | Neg.                |
| <b>Tonsil 3</b>          | 2+, in surrounding squamous epithelial cells              | Neg.                            | Neg.                                                      | Neg.                |
| <b>Uterus 1</b>          | Neg.                                                      | Neg.                            | Neg.                                                      | Neg.                |
| <b>Uterus 2</b>          | Neg.                                                      | Neg.                            | Neg.                                                      | Neg.                |
| <b>Uterus 3</b>          | Neg.                                                      | Neg.                            | Neg.                                                      | Neg.                |
| <b>Uterus, cervix 1</b>  | 2+, in squamous epithelial cells                          | Neg.                            | Neg.                                                      | Neg.                |
| <b>Uterus, cervix 2</b>  | Neg. (no epithelium)                                      | Neg.                            | Neg.                                                      | Neg.                |
| <b>Uterus, cervix 3</b>  | Neg. (no epithelium)                                      | Neg.                            | Neg.                                                      | Neg.                |
| <b>Bone marrow 1</b>     | 1+, diffuse                                               | 1+, diffuse                     | 1+, diffuse                                               | 1+, diffuse         |
| <b>Bone marrow 2</b>     | 1+, diffuse                                               | 1+, diffuse                     | 1+, diffuse                                               | 1+, diffuse         |
| <b>Bone marrow 3</b>     | 1+, diffuse                                               | 1+, diffuse                     | 1+, diffuse                                               | 1+, diffuse         |

**Supplementary Table 1B.** 3-17I shows less reaction in healthy tissue than MOC31. Immunohistochemistry studies of 3-17I and MOC31 (both IgG2A), and IgG2A isotype control, binding to healthy tissue samples. **List summarizes the tissues in Supplementary Table 1A to which 3-17I shows less reaction than MOC31.** Staining intensity was judged as; negative (0), weak reaction (1+), moderate reaction (2+), or strong reaction (3+).

| Tissue           | MOC31B                                       | 3-17I                                       | Isotype, IgG2A |
|------------------|----------------------------------------------|---------------------------------------------|----------------|
| Adrenal 1        | 1+, diffuse                                  | Negative                                    | Negative       |
| Adrenal 2        | 1+, diffuse                                  | Negative                                    | Negative       |
| Esophagus 2      | 2+, in epithelial cells                      | Negative                                    | Negative       |
| Lung 1           | 2+                                           | 1+                                          | Negative       |
| Lung 2           | 2+                                           | 1+                                          | Negative       |
| Lung 3           | 3+                                           | 2+                                          | Negative       |
| Skin 1           | 2+, in epidermis                             | 1+, in epidermis                            | Negative       |
| Skin 2           | 2+, in epidermis                             | 1+, in epidermis                            | Negative       |
| Thymus 1         | 3+, probably in epithelial cells of medulla  | 2+, probably in epithelial cells of medulla | Negative       |
| Thymus 2         | 3+, probably in epithelial cells of medulla  | 2+, probably in epithelial cells of medulla | Negative       |
| Thymus 3         | 3+, probably in epithelial cells of medulla  | 2+, probably in epithelial cells of medulla | Negative       |
| Tonsil 2         | 2+, in surrounding squamous epithelial cells | Negative                                    | Negative       |
| Tonsil 3         | 2+, in surrounding squamous epithelial cells | Negative                                    | Negative       |
| Uterus, cervix 1 | 2+, in squamous epithelial cells             | Negative                                    | Negative       |

**Supplementary Table 2A.** Immunohistochemistry studies of colon cancer tissue reactivity (n=37\*) of 3-17I, MOC31, MT201 (all IgG2A), and IgG2A isotype control. Staining intensity was judged as; negative (0), weak reaction (1+), moderate reaction (2+), or strong reaction (3+).

\*One colon tissue sample was omitted due to lack of malignant tumor cells.

| Colon cancer tumor # | age | sex | Pathological diagnosis  | MOC31B         | MT201          | 3-17I          | Isotype, IgG2A |
|----------------------|-----|-----|-------------------------|----------------|----------------|----------------|----------------|
| A1                   | 67  | m   | Adenocarcinoma          | 3+             | Neg.           | 3+             | Neg.           |
| A2                   | 80  | f   | Adenocarcinoma          | 3+             | Neg.           | 3+             | Neg.           |
| A3                   | 59  | f   | Adenocarcinoma          | 3+             | Neg.           | 3+             | Neg.           |
| A4                   | 60  | m   | Adenocarcinoma          | 3+             | Neg.           | 3+             | Neg.           |
| A5                   | 71  | f   | Adenocarcinoma          | 3+             | Neg.           | 3+             | Neg.           |
| A6                   | 46  | f   | Adenocarcinoma          | 3+             | Neg.           | 3+             | Neg.           |
| A7                   | 79  | m   | Adenocarcinoma          | 3+             | Neg.           | 3+             | Neg.           |
| A8                   | 68  | f   | Adenocarcinoma mucinous | 3+             | Neg.           | 3+             | Neg.           |
| B1                   | 37  | m   | Adenocarcinoma mucinous | 3+             | Neg.           | 3+             | Neg.           |
| B2                   | 65  | m   | Adenocarcinoma          | 3+             | Neg.           | 3+             | Neg.           |
| B3                   | 56  | f   | Adenocarcinoma          | 3+             | Neg.           | 3+             | Neg.           |
| B4                   | 52  | f   | Adenocarcinoma          | 3+             | Neg.           | 3+             | Neg.           |
| B5                   | 63  | m   | Adenocarcinoma          | 3+             | 3+, in mucin   | 3+             | 3+, in mucin   |
| B6                   | 74  | m   | Adenocarcinoma          | 3+             | Neg.           | 3+             | Neg.           |
| B7                   | 75  | m   | Adenocarcinoma          | 3+             | 3+, unspecific | 3+             | 3+, unspecific |
| B8                   | 74  | m   | Adenocarcinoma          | 3+             | Neg.           | 3+             | Unspecific     |
| C1                   | 68  | m   | Adenocarcinoma          | 3+             | Neg.           | 3+             | Neg.           |
| C2                   | 73  | m   | Adenocarcinoma          | 3+             | Neg.           | 3+             | Neg.           |
| C3                   | 43  | m   | Adenocarcinoma          | No tumor cells | No tumor cells | No tumor cells | No tumor cells |
| C4                   | 64  | m   | Adenocarcinoma          | 3+             | Neg.           | 3+             | Neg.           |
| C5                   | 75  | f   | Adenocarcinoma          | 3+             | Neg.           | 3+             | Neg.           |
| C6                   | 50  | m   | Adenocarcinoma          | 3+             | Neg.           | 3+             | Neg.           |
| C7                   | 63  | f   | Adenocarcinoma          | 3+             | Neg.           | 3+             | Neg.           |
| C8                   | 61  | m   | Adenocarcinoma          | 3+             | Neg.           | 3+             | Neg.           |
| D1                   | 53  | m   | Adenocarcinoma          | 3+             | Neg.           | 3+             | Neg.           |
| D2                   | 49  | f   | Adenocarcinoma          | 3+             | Neg.           | 3+             | Neg.           |
| D3                   | 79  | m   | Adenocarcinoma          | 3+             | Neg.           | 3+             | Neg.           |
| D4                   | 70  | m   | Adenocarcinoma          | 3+             | Neg.           | 3+             | Neg.           |
| D5                   | 62  | f   | Adenocarcinoma mucinous | 3+             | Neg.           | 3+             | Neg.           |
| D6                   | 71  | m   | Adenocarcinoma          | 3+             | Neg.           | 3+             | Neg.           |
| D7                   | 57  | f   | Adenocarcinoma          | 3+             | Neg.           | 3+             | Neg.           |
| D8                   | 87  | m   | Adenocarcinoma          | 3+             | Neg.           | 3+             | Neg.           |
| E1                   | 73  | f   | Adenocarcinoma          | 3+             | Neg.           | 3+             | Neg.           |
| E2                   | 48  | m   | Adenocarcinoma          | 3+             | Neg.           | 3+             | Neg.           |
| E3                   | 63  | m   | Adenocarcinoma          | 3+             | Neg.           | 3+             | Neg.           |
| E4                   | 36  | m   | Adenocarcinoma          | 3+             | Neg.           | 3+             | Neg.           |
| E5                   | 45  | m   | Adenocarcinoma          | 3+             | Neg.           | 3+             | Neg.           |



**Supplementary Table 2B.** Immunohistochemistry studies of breast cancer tissue reactivity (n=37) of 3-17I, MOC31, MT201 (all IgG2A), and IgG2A isotype control. Staining intensity was judged as; negative (0), weak reaction (1+), moderate reaction (2+), or strong reaction (3+).

| Breast cancer tumor # | age | sex | Pathological diagnosis         | MOC31B | MT201 | 3-17I | Isotype, IgG2A |
|-----------------------|-----|-----|--------------------------------|--------|-------|-------|----------------|
| A1                    | 64  | f   | Invasive ductal adenocarcinoma | 3+     | Neg.  | 3+    | Neg.           |
| A2                    | 70  | f   | Invasive ductal adenocarcinoma | 3+     | Neg.  | 3+    | Neg.           |
| A3                    | 48  | f   | Invasive ductal adenocarcinoma | 3+     | Neg.  | 3+    | Neg.           |
| A4                    | 57  | f   | Invasive ductal adenocarcinoma | 3+     | Neg.  | 3+    | Neg.           |
| A5                    | 65  | f   | Invasive ductal adenocarcinoma | 3+     | Neg.  | 3+    | Neg.           |
| A6                    | 65  | f   | Invasive ductal adenocarcinoma | 3+     | Neg.  | 3+    | Neg.           |
| A7                    | 53  | f   | Invasive ductal adenocarcinoma | 3+     | Neg.  | 3+    | Neg.           |
| A8                    | 82  | f   | Invasive ductal adenocarcinoma | 3+     | Neg.  | 3+    | Neg.           |
| B1                    | 64  | f   | Invasive ductal adenocarcinoma | 3+     | Neg.  | 3+    | Neg.           |
| B2                    | 34  | f   | Invasive ductal adenocarcinoma | 3+     | Neg.  | 3+    | Neg.           |
| B3                    | 40  | f   | Invasive ductal adenocarcinoma | 3+     | Neg.  | 3+    | Neg.           |
| B4                    | 48  | f   | Invasive ductal adenocarcinoma | 3+     | Neg.  | 3+    | Neg.           |
| B5                    | 57  | f   | Invasive ductal adenocarcinoma | 3+     | Neg.  | 3+    | Neg.           |
| B6                    | 77  | f   | Invasive ductal adenocarcinoma | 3+     | Neg.  | 3+    | Neg.           |
| B7                    | 42  | f   | Invasive ductal adenocarcinoma | 3+     | Neg.  | 3+    | Neg.           |
| B8                    | 47  | f   | Invasive ductal adenocarcinoma | 3+     | Neg.  | 3+    | Neg.           |
| C1                    | 34  | f   | Invasive ductal adenocarcinoma | 3+     | Neg.  | 3+    | Neg.           |
| C2                    | 48  | f   | Invasive ductal adenocarcinoma | 3+     | Neg.  | 3+    | Neg.           |
| C3                    | 41  | f   | Invasive ductal adenocarcinoma | 3+     | Neg.  | 3+    | Neg.           |
| C4                    | 47  | f   | Invasive ductal adenocarcinoma | 3+     | Neg.  | 3+    | Neg.           |
| C5                    | 37  | f   | Invasive ductal adenocarcinoma | 3+     | Neg.  | 3+    | Neg.           |
| C6                    | 32  | f   | Invasive ductal adenocarcinoma | 3+     | Neg.  | 3+    | Neg.           |
| C7                    | 63  | f   | Invasive ductal adenocarcinoma | 3+     | Neg.  | 3+    | Neg.           |
| C8                    | 50  | f   | Invasive ductal adenocarcinoma | 3+     | Neg.  | 3+    | Neg.           |
| D1                    | 56  | f   | Invasive ductal adenocarcinoma | 3+     | Neg.  | 3+    | Neg.           |
| D2                    | 56  | f   | Invasive ductal adenocarcinoma | 3+     | Neg.  | 3+    | Neg.           |
| D3                    | 41  | f   | Invasive ductal adenocarcinoma | 3+     | Neg.  | 3+    | Neg.           |
| D4                    | 47  | f   | Invasive ductal adenocarcinoma | 3+     | Neg.  | 3+    | Neg.           |
| D5                    | 60  | f   | Invasive ductal adenocarcinoma | 3+     | Neg.  | 3+    | Neg.           |
| D6                    | 46  | f   | Invasive ductal adenocarcinoma | 3+     | Neg.  | 3+    | Neg.           |
| D7                    | 45  | f   | Invasive ductal adenocarcinoma | 3+     | Neg.  | 3+    | Neg.           |
| D8                    | 57  | f   | Invasive ductal adenocarcinoma | 3+     | Neg.  | 3+    | Neg.           |
| E1                    | 37  | f   | Invasive ductal adenocarcinoma | 3+     | Neg.  | 3+    | Neg.           |
| E2                    | 57  | f   | Invasive ductal adenocarcinoma | 3+     | Neg.  | 3+    | Neg.           |
| E3                    | 67  | f   | Invasive ductal adenocarcinoma | 3+     | Neg.  | 3+    | Neg.           |
| E4                    | 63  | f   | Invasive ductal adenocarcinoma | 3+     | Neg.  | 3+    | Neg.           |
| E5                    | 50  | f   | Invasive ductal adenocarcinoma | 3+     | Neg.  | 3+    | Neg.           |

**Supplementary Table 2C.** Immunohistochemistry studies of lung cancer tissue reactivity (n=37\*) of 3-17I, MOC31, MT201 (all IgG2A), and IgG2A isotype control. Staining intensity was judged as; negative (0), weak reaction (1+), moderate reaction (2+), or strong reaction (3+).

\*One lung tissue sample was a sarcoma and thus has no epithelial origin.

| Lung cancer tumor # | age | sex | Pathological diagnosis                | MOC31B | MT201 | 3-17I | Isotype, IgG2A |
|---------------------|-----|-----|---------------------------------------|--------|-------|-------|----------------|
| A1                  | 39  | f   | Adenocarcinoma                        | 3+     | Neg.  | 3+    | Neg.           |
| A2                  | 66  | m   | Adenocarcinoma                        | 3+     | Neg.  | 3+    | Neg.           |
| A3                  | 70  | m   | Adenocarcinoma                        | 3+     | Neg.  | 3+    | Neg.           |
| A4                  | 70  | m   | Adenocarcinoma                        | 3+     | Neg.  | 3+    | Neg.           |
| A5                  | 64  | f   | Adenocarcinoma, papillary             | 3+     | Neg.  | 3+    | Neg.           |
| A6                  | 68  | m   | Undifferentiated small cell carcinoma | 3+     | Neg.  | 3+    | Neg.           |
| A7                  | 39  | m   | Undifferentiated small cell carcinoma | 3+     | Neg.  | 3+    | Neg.           |
| A8                  | 75  | m   | Bronchio alveolar carcinoma           | 3+     | Neg.  | 3+    | Neg.           |
| B1                  | 50  | m   | Bronchio alveolar carcinoma           | 3+     | Neg.  | 3+    | Neg.           |
| B2                  | 42  | m   | Bronchio alveolar carcinoma           | 3+     | Neg.  | 3+    | Neg.           |
| B3                  | 69  | m   | Carcinoma, sarcoma                    | Neg.   | Neg.  | Neg.  | Neg.           |
| B4                  | 61  | m   | Carcinoma, sarcoma todes              | 3+     | Neg.  | 3+    | Neg.           |
| B5                  | 60  | m   | Harmatoma                             | 3+     | Neg.  | 3+    | Neg.           |
| B6                  | 46  | m   | Squamous cell carcinoma               | 3+     | Neg.  | 3+    | Neg.           |
| B7                  | 63  | m   | Squamous cell carcinoma               | 3+     | Neg.  | 3+    | Neg.           |
| B8                  | 53  | m   | Squamous cell carcinoma               | 3+     | Neg.  | 3+    | Neg.           |
| C1                  | 69  | m   | Squamous cell carcinoma               | 3+     | Neg.  | 3+    | Neg.           |
| C2                  | 64  | m   | Squamous cell carcinoma               | 3+     | Neg.  | 3+    | Neg.           |
| C3                  | 33  | m   | Squamous cell carcinoma               | 3+     | Neg.  | 3+    | Neg.           |
| C4                  | 62  | m   | Squamous cell carcinoma               | 3+     | Neg.  | 3+    | Neg.           |
| C5                  | 66  | m   | Squamous cell carcinoma               | 3+     | Neg.  | 3+    | Neg.           |
| C6                  | 63  | m   | Squamous cell carcinoma               | 3+     | Neg.  | 3+    | Neg.           |
| C7                  | 53  | m   | Squamous cell carcinoma               | 3+     | Neg.  | 3+    | Neg.           |
| C8                  | 53  | m   | Squamous cell carcinoma               | 3+     | Neg.  | 3+    | Neg.           |
| D1                  | 70  | m   | Squamous cell carcinoma               | 3+     | Neg.  | 3+    | Neg.           |
| D2                  | 73  | m   | Squamous cell carcinoma               | 3+     | Neg.  | 3+    | Neg.           |
| D3                  | 68  | m   | Squamous cell carcinoma               | 3+     | Neg.  | 3+    | Neg.           |
| D4                  | 65  | f   | Squamous cell carcinoma               | 3+     | Neg.  | 3+    | Neg.           |
| D5                  | 50  | m   | Squamous cell carcinoma               | 3+     | Neg.  | 3+    | Neg.           |
| D6                  | 52  | m   | Squamous cell carcinoma               | 3+     | Neg.  | 3+    | Neg.           |
| D7                  | 66  | m   | Squamous cell carcinoma               | 3+     | Neg.  | 3+    | Neg.           |
| D8                  | 72  | f   | Squamous cell carcinoma               | 3+     | Neg.  | 3+    | Neg.           |
| E1                  | 57  | m   | Squamous cell carcinoma               | 3+     | Neg.  | 3+    | Neg.           |
| E2                  | 66  | m   | Squamous cell carcinoma               | 3+     | Neg.  | 3+    | Neg.           |
| E3                  | 70  | m   | Squamous cell carcinoma               | 3+     | Neg.  | 3+    | Neg.           |
| E4                  | 62  | m   | Squamous cell carcinoma               | 3+     | Neg.  | 3+    | Neg.           |
| E5                  | 61  | f   | Squamous cell carcinoma               | 3+     | Neg.  | 3+    | Neg.           |
